# Supplementary material for: Proximate Composition and Nutritional Profile of Rainbow Trout (Oncorhynchus mykiss) Heads and Skipjack tuna (Katsuwonus Pelamis) Heads
Source: MDPI journal article supplement (doi:10.3390/molecules24173189), 2019-09-02
Supplement: s1 [file s1]

## Supplementary File

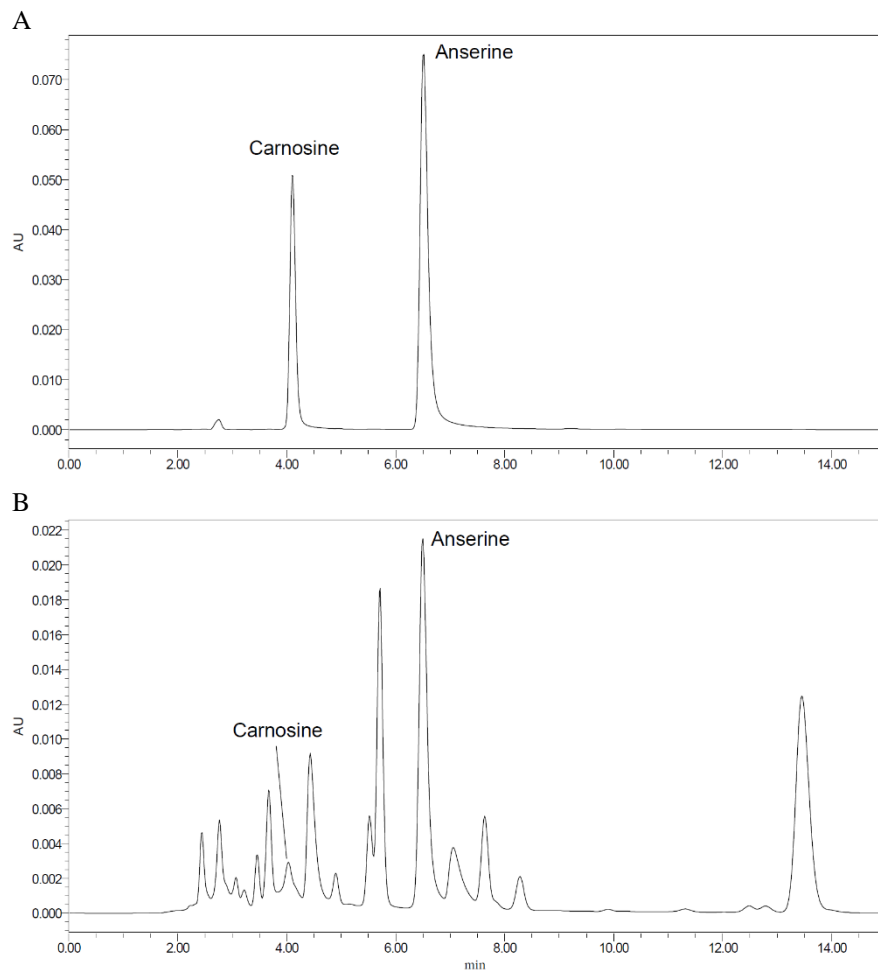

**Figure S1.** Typical HPLC chromatograms of (A) standard solution (250 mg/L) and (B) the extract of rainbow trout head.
